# Supplementary material for: ddRAD-seq reveals the genetic structure and detects signals of selection in Italian brown trout
Source: PubMed Central journal article supplement (PMC8805291; doi:10.1186/s12711-022-00698-7), 2022-01-31

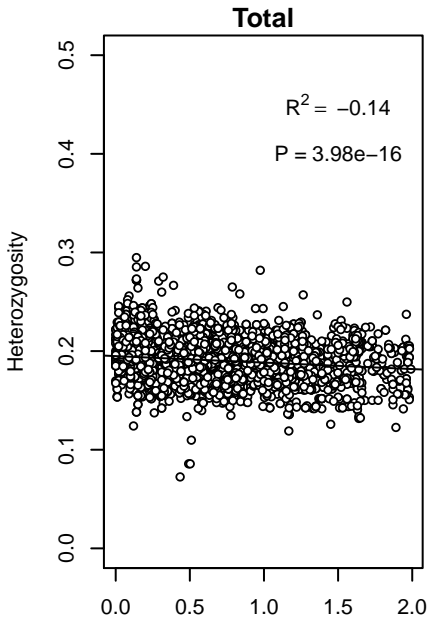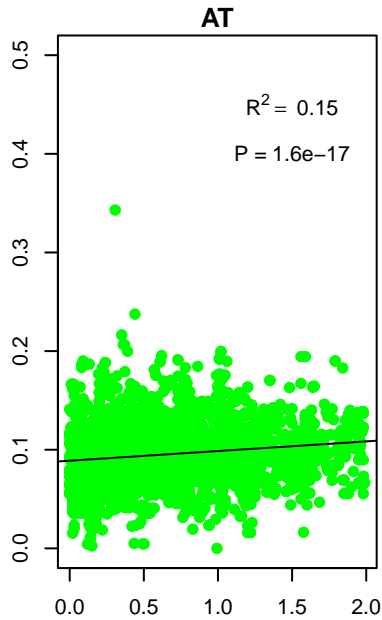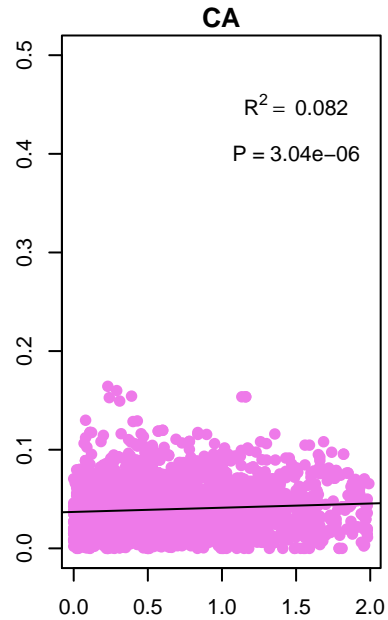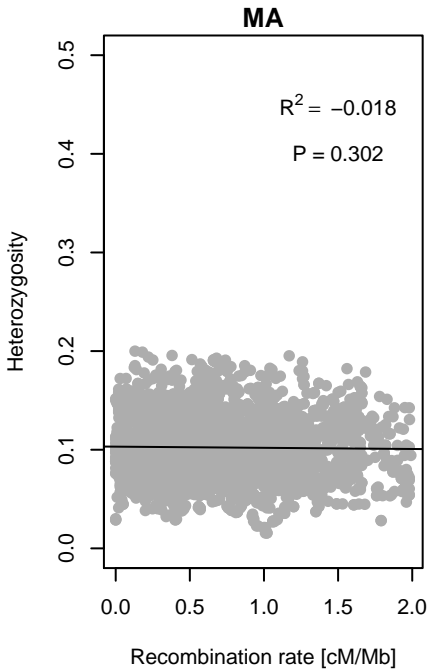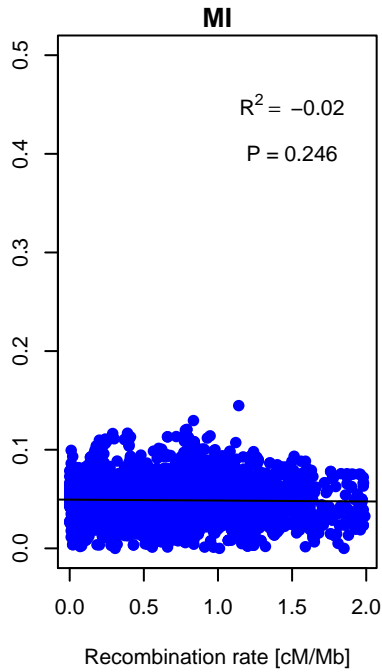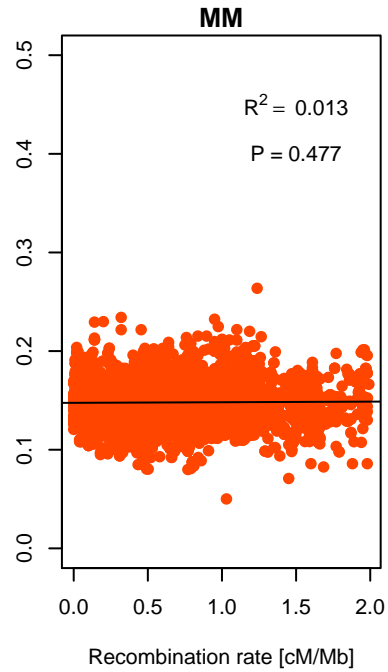

Supplement: 12711_2022_698_MOESM10_ESM.pdf [file 12711_2022_698_MOESM10_ESM.pdf]
